# Supplementary material
Source: PubMed Central journal article supplement (PMC2538813)
Supplement: 2008.153551_1.pdf [file 2008.153551_1.pdf]

| Probe ID     | Gene Name                                                             | Genbank Accession | Fold change 0h | Fold change 3h | Fold change 6h | 0h-CO   | 0h-DP   | 0h-HH   | 3h-CO   | 3h-DP   | 3h-HH   | 6h-CO   | 6h-DP  | 6h-HH   |
|--------------|-----------------------------------------------------------------------|-------------------|----------------|----------------|----------------|---------|---------|---------|---------|---------|---------|---------|--------|---------|
| 208859_s_at  | alpha thalassemia/mental retardation syndrome X-linked                | AI650257          | 1.00           | 0.92           | 0.46           | 39.25   | 29.27   | 42.4    | 45.14   | 27.98   | 28.54   | 21.22   | 8.64   | 20.93   |
| 1569607_s_at | ankyrin repeat domain 20A                                             | BC016022          | 1.00           | 0.60           | 0.37           | 31.69   | 21.02   | 25.93   | 15.57   | 16.95   | 14.28   | 12.92   | 8.61   | 7.9     |
| 236524_at    | Beta-amyloid binding protein precursor                                | AA737437          | 1.00           | 1.08           | 0.53           | 23.18   | 24.97   | 29.39   | 33.02   | 27.14   | 23.58   | 15.22   | 8.88   | 17.07   |
| 214464_at    | CDC42 binding protein kinase alpha (DMPK-like)                        | NM_003607         | 1.00           | 0.96           | 0.46           | 16.68   | 20.41   | 21.79   | 19.18   | 17.73   | 19.7    | 8.58    | 11.41  | 7.19    |
| 241403_at    | CDC-like kinase 4                                                     | AA468591          | 1.00           | 0.72           | 0.49           | 37.72   | 33.61   | 76.92   | 40.03   | 23.75   | 42.51   | 23.52   | 14.83  | 34.57   |
| 212977_at    | chemokine orphan receptor 1                                           | AI817041          | 1.00           | 0.79           | 0.49           | 46.13   | 68.47   | 43.83   | 46.11   | 47.1    | 32.35   | 19.6    | 41.2   | 17      |
| 230180_at    | DEAD (Asp-Glu-Ala-Asp) box polypeptide 17                             | AA521056          | 1.00           | 0.68           | 0.29           | 116.1   | 104.1   | 105.49  | 85.64   | 57.39   | 79.9    | 45.85   | 19.01  | 29.51   |
| 221563_at    | dual specificity phosphatase 10                                       | N36770            | 1.00           | 0.53           | 0.49           | 65.07   | 74.76   | 80.31   | 45.28   | 41.15   | 31.21   | 25.68   | 44.01  | 38.23   |
| 214608_s_at  | eyes absent homolog 1 (Drosophila)                                    | AJ000098          | 1.00           | 0.64           | 0.40           | 22.54   | 10.63   | 8.96    | 13.58   | 8.04    | 5.38    | 5.98    | 6.16   | 4.69    |
| 204358_s_at  | fibronectin leucine rich transmembrane protein 2                      | AF169676          | 1.00           | 0.81           | 0.48           | 14.35   | 13.15   | 26.4    | 11.65   | 13.1    | 18.95   | 9.31    | 7.08   | 9.71    |
| 224840_at    | FK506 binding protein 5                                               | AI753747          | 1.00           | 1.75           | 2.62           | 888.8   | 263.24  | 1444.94 | 1474.68 | 796.77  | 2279    | 3346.05 | 834.69 | 2616.76 |
| 203706_s_at  | frizzled homolog 7 (Drosophila)                                       | NM_003507         | 1.00           | 0.50           | 0.68           | 108.82  | 111.23  | 80.54   | 42.84   | 72.62   | 33.74   | 55.82   | 95.66  | 54.17   |
| 226471_at    | gamma-glutamyltransferase-like 3                                      | AI423493          | 1.00           | 1.38           | 2.40           | 20.08   | 28.58   | 34.45   | 35.3    | 29.99   | 49.54   | 56.34   | 36.46  | 106.42  |
| 241955_at    | HECT domain containing 1                                              | BE243270          | 1.00           | 0.89           | 0.43           | 42.85   | 68.39   | 64.68   | 57.67   | 60.45   | 37.61   | 19.56   | 25.88  | 30.32   |
| 228813_at    | histone deacetylase 4                                                 | AW206037          | 1.00           | 1.60           | 2.88           | 95.96   | 59.96   | 80.31   | 121.98  | 124.04  | 133.09  | 257.1   | 132.06 | 292.16  |
| 205659_at    | histone deacetylase 9                                                 | NM_014707         | 1.00           | 0.37           | 0.19           | 89.54   | 61.08   | 92.85   | 34.92   | 31.87   | 24.26   | 14.61   | 18.6   | 12.93   |
| 207826_s_at  | inhibitor of DNA binding 3                                            | NM_002167         | 1.00           | 0.47           | 0.69           | 48.67   | 64.83   | 40.68   | 23.97   | 22.19   | 26.18   | 37.82   | 42.01  | 25.93   |
| 204686_at    | insulin receptor substrate 1                                          | NM_005544         | 1.00           | 0.47           | 0.35           | 264.28  | 209.54  | 339.48  | 127.13  | 136.08  | 117.11  | 51.14   | 141.27 | 95.03   |
| 206349_at    | leucine-rich, glioma inactivated 1                                    | NM_005097         | 1.00           | 0.74           | 0.48           | 21.21   | 15.42   | 16.75   | 17.12   | 14.01   | 8.18    | 9.86    | 7.81   | 7.71    |
| 239571_at    | MADS box transcription enhancer factor 2, polypeptide A               | AI123399          | 1.00           | 0.71           | 0.35           | 41.61   | 28.89   | 34.33   | 30.03   | 23.98   | 20.86   | 17.43   | 11.39  | 7.99    |
| 226675_s_at  | metastasis associated lung adenocarcinoma transcript 1                | W80468            | 1.00           | 0.73           | 0.30           | 491.15  | 369.5   | 449.7   | 289.25  | 326.19  | 343.11  | 145.21  | 105.47 | 137.99  |
| 236356_at    | NADH dehydrogenase (ubiquinone) Fe-S protein 1                        | AI808395          | 1.00           | 0.68           | 0.36           | 96.12   | 145.99  | 211.48  | 102.89  | 100.67  | 106.74  | 56.46   | 40.59  | 65.88   |
| 233780_at    | Nebulin                                                               | AI003806          | 1.00           | 0.77           | 0.34           | 85.15   | 147.72  | 139.64  | 84.88   | 100.23  | 101.25  | 48.9    | 31.42  | 44.67   |
| 219158_s_at  | NMDA receptor regulated 1                                             | NM_025085         | 1.00           | 0.81           | 0.38           | 69.66   | 181.49  | 107.94  | 72.84   | 139.99  | 79.43   | 52.84   | 48.86  | 35.9    |
| 208003_s_at  | nuclear factor of activated T-cells 5, tonicity-responsive            | NM_006599         | 1.00           | 0.80           | 0.47           | 14.86   | 12.16   | 13.95   | 13.39   | 11.08   | 8.22    | 9.51    | 4.42   | 5.18    |
| 209750_at    | nuclear receptor subfamily 1, group D, member 2                       | N32859            | 1.00           | 0.82           | 0.47           | 234.88  | 369.59  | 452.19  | 220.59  | 356.37  | 293.66  | 124.49  | 199.07 | 175.28  |
| 226140_s_at  | OTU domain containing 1                                               | AI934347          | 1.00           | 0.34           | 0.31           | 192.53  | 277.73  | 174.1   | 36.11   | 163.47  | 21.01   | 19.28   | 156.99 | 21.01   |
| 1557553_at   | Protein phosphatase 1, regulatory (inhibitor) subunit 12B             | BF438357          | 1.00           | 1.06           | 0.52           | 51.91   | 61.06   | 41.08   | 58.99   | 59.8    | 44.3    | 32.57   | 19.76  | 28.03   |
| 211169_s_at  | protein phosphatase 1, regulatory (inhibitor) subunit 3A              | AF024579          | 1.00           | 0.74           | 0.46           | 134.67  | 385.27  | 416.15  | 129.63  | 317.49  | 244.41  | 50.88   | 176.49 | 199.39  |
| 222572_at    | protein phosphatase 2C, magnesium-dependent, catalytic subunit        | BG542521          | 1.00           | 0.55           | 0.28           | 960.75  | 592.79  | 967.46  | 615.29  | 271.85  | 493.24  | 275.92  | 221.15 | 216.3   |
| 236620_at    | RAP1 interacting factor homolog (yeast)                               | AU150841          | 1.00           | 0.89           | 0.49           | 25.41   | 16.05   | 15.5    | 20.88   | 13.98   | 15.71   | 12.3    | 6.91   | 8.7     |
| 1558924_s_at | Restin                                                                | BF673049          | 1.00           | 0.75           | 0.43           | 67.52   | 211.29  | 127.93  | 56.2    | 165.58  | 84.01   | 32.19   | 77.81  | 64.33   |
| 238763_at    | RNA binding motif protein 20                                          | AI539118          | 1.00           | 0.74           | 0.49           | 80.03   | 190.15  | 82.69   | 71.48   | 137.24  | 53.48   | 55.41   | 72.43  | 43.63   |
| 202917_s_at  | S100 calcium binding protein A8 (calgranulin A)                       | NM_002964         | 1.00           | 5.59           | 2.09           | 6.74    | 15.88   | 7.27    | 39.83   | 70.54   | 56.65   | 21.87   | 26.66  | 13.91   |
| 218370_s_at  | S100P binding protein Riken                                           | NM_002753         | 1.00           | 0.49           | 0.63           | 19.89   | 17.25   | 19.79   | 12.78   | 9.18    | 6.04    | 14.71   | 11.87  | 9.51    |
| 204964_s_at  | sarcospan (Kras oncogene-associated gene)                             | NM_005086         | 1.00           | 1.02           | 0.50           | 161.13  | 100.31  | 111.36  | 169.84  | 92.44   | 116.15  | 108.26  | 31.89  | 46.74   |
| 1556416_s_at | SEC31-like 1 (S. cerevisiae)                                          | AF086242          | 1.00           | 0.74           | 0.46           | 31.36   | 30.13   | 36.32   | 27.77   | 21.59   | 22.86   | 19.62   | 12.82  | 12.81   |
| 207057_at    | solute carrier family 16 (monocarboxylic acid transporters), member 7 | NM_004731         | 1.00           | 0.92           | 0.45           | 49.1    | 15.1    | 25.24   | 42.17   | 17.85   | 22.46   | 18.28   | 10.66  | 11.49   |
| 213850_s_at  | splicing factor, arginine/serine-rich 2, interacting protein          | AI984932          | 1.00           | 1.05           | 0.49           | 112.59  | 115.3   | 107.84  | 130.57  | 108.44  | 112.66  | 67.89   | 39.75  | 58.42   |
| 201009_s_at  | thioredoxin interacting protein                                       | AI439556          | 1.00           | 1.92           | 2.01           | 1520.76 | 1491.21 | 1129.15 | 2996.83 | 2113.55 | 2846.86 | 3077    | 2104   | 3134.77 |
| 31637_s_at   | thyroid hormone receptor, alpha                                       | X72631            | 1.00           | 0.59           | 0.32           | 55.24   | 146.04  | 63.27   | 29.53   | 107.47  | 18.58   | 23.67   | 43.93  | 18.14   |
| 212758_s_at  | transcription factor 8 (represses interleukin 2 expression)           | AI373166          | 1.00           | 0.81           | 0.42           | 41.95   | 112.98  | 128.68  | 61.53   | 103.36  | 66.12   | 24.47   | 45.03  | 50      |
| 222633_at    | transducin (beta)-like 1X-linked receptor 1                           | AF268193          | 1.00           | 0.77           | 0.35           | 58.48   | 53.42   | 49.65   | 42.54   | 39.82   | 41.8    | 26.26   | 12.48  | 17.51   |
| 228121_at    | Transforming growth factor, beta 2                                    | AU145950          | 1.00           | 0.65           | 0.47           | 45.04   | 84.6    | 26.09   | 30.24   | 51.84   | 18.61   | 21.37   | 33.67  | 18.27   |
| 230493_at    | transmembrane protein 46                                              | AW664964          | 1.00           | 0.56           | 0.30           | 68.38   | 95.25   | 174.92  | 60      | 61.89   | 66.28   | 27.75   | 32.07  | 42.04   |
| 207213_s_at  | ubiquitin specific protease 2                                         | NM_004205         | 1.00           | 0.65           | 0.30           | 14.71   | 28.35   | 18.82   | 15.29   | 15.22   | 9.62    | 7.43    | 6.73   | 4.24    |
| 225612_s_at  | UDP-GlcNAc:betaGal beta-1,3-N-acetylglucosaminyltransferase 5         | BE672260          | 1.00           | 0.42           | 0.67           | 39.79   | 18.48   | 38.25   | 18.49   | 10.39   | 11.59   | 26.58   | 10.21  | 28.31   |
| 207349_s_at  | uncoupling protein 3 (mitochondrial, proton carrier)                  | NM_022803         | 1.00           | 1.33           | 2.21           | 163.42  | 323.61  | 394.86  | 346.38  | 298.99  | 531.86  | 490.99  | 477.04 | 977.03  |
| 236352_at    | vestigial like 2 (Drosophila)                                         | AI276196          | 1.00           | 0.55           | 0.35           | 261.94  | 1000.99 | 169.98  | 169.52  | 508.43  | 109.49  | 118.21  | 302.55 | 82.92   |
| 236354_at    | Zinc finger, MYND domain containing 17                                | AW014735          | 1.00           | 0.58           | 0.36           | 42.03   | 41.28   | 54.48   | 16.48   | 40.45   | 22.93   | 13.47   | 24.04  | 12.66   |

Supplementary data

Known genes significantly (p<0.05) changed in skeletal muscle tissue in humans in response to a 3 h IL-6 infusion (from 0 h to 3 h) gcRMA normalized expression values for each gene per replicate and time point is given at the right
